# Supplementary material for: Therapeutic antibody targeting microtubule-binding domain prevents neuronal internalization of extracellular tau via masking neuron surface proteoglycans
Source: PubMed Central journal article supplement (PMC6685285; doi:10.1186/s40478-019-0770-y), 2019-08-07

# Supplementary Figure 1

**A** AD Tau inside neurons

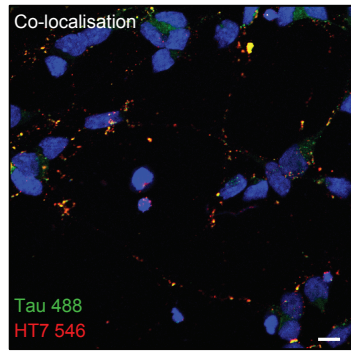

HT7 immunostaining

**B** AD Tau neuronal uptake

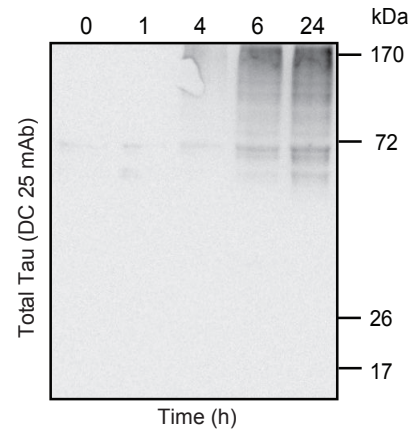

Supplement: 40478_2019_770_MOESM1_ESM.pdf [file 40478_2019_770_MOESM1_ESM.pdf]
